# Supplementary material
Source: HighWire-hosted journal article supplement (https://jnm.snmjournals.org/highwire/filestream/94608/field_highwire_adjunct_files/0/139626_Supplemental_Data.pdf)
Supplement: 139626_Supplemental_Data.pdf [file 139626_Supplemental_Data.pdf]

**SUPPLEMENTAL TABLE 1: Correlation of MR CE<sup>†</sup> with FDG uptake by tumor type**

| Tumor Type                           | CE <sup>†</sup> |      |                     |      |                                       |       |              |
|--------------------------------------|-----------------|------|---------------------|------|---------------------------------------|-------|--------------|
|                                      | No Correlation  |      | Partial Correlation |      | Near Complete or Complete Correlation |       | All Patients |
|                                      | N               | Row% | N                   | Row% | N                                     | Row%  |              |
|                                      |                 |      |                     |      |                                       |       |              |
| AA <sup>‡</sup> RR <sup>§</sup>      | 1               | 4.3  | 10                  | 43.5 | 12                                    | 52.2  | 23           |
| A/AG <sup>  </sup> RR <sup>§</sup>   | 1               | 5.6  | 4                   | 22.2 | 13                                    | 72.2  | 18           |
| EP <sup>¶</sup> RR <sup>§</sup>      | .               | .    | 2                   | 25.0 | 6                                     | 75.0  | 8            |
| MB <sup>#</sup> RR <sup>§</sup>      | .               | .    | 1                   | 14.3 | 6                                     | 85.7  | 7            |
| BSG <sup>**</sup> ND <sup>††</sup>   | 6               | 21.4 | 7                   | 25.0 | 15                                    | 53.6  | 28           |
| BSG <sup>**</sup> RR <sup>§</sup>    |                 |      |                     |      |                                       |       |              |
| (p <sup>§§</sup> =0.75)              | 2               | 13.3 | 5                   | 33.3 | 8                                     | 53.3  | 15           |
| GBM <sup>†††</sup> ND <sup>††</sup>  | .               | .    | .                   | .    | 7                                     | 100.0 | 7            |
| GBM <sup>†††</sup> RR <sup>§</sup>   |                 |      |                     |      |                                       |       |              |
| (p <sup>§§</sup> =NA <sup>  </sup> ) | .               | .    | 1                   | 7.1  | 13                                    | 92.9  | 14           |
| All Patients                         | 10              | 8.3  | 30                  | 25.0 | 80                                    | 66.7  | 120          |

<sup>†</sup>Contrast data missing for 51 patients.

<sup>††</sup>Newly diagnosed vs. refractory/recurrent compared using Cochran-Armitage Trend test.

<sup>†</sup>CE=Contrast Enhancement, <sup>‡</sup>AA=Anaplastic

Astrocytoma, <sup>§</sup>RR=Refractory/recurrent, <sup>||</sup>A/AG=Astrocytoma/Astrocytic

Glioma, <sup>¶</sup>EP=Ependymoma, <sup>#</sup>MB=Medulloblastoma, <sup>\*\*</sup>BSG=Brain Stem Glioma, <sup>††</sup>ND=Newly

Diagnosed, <sup>††</sup>GBM=Glioblastoma Multiforme, <sup>§§</sup>p = p value, <sup>||</sup>NA=not available,

**SUPPLEMENTAL TABLE 2: Spearman's rank correlations\* between MR and FDG-PET variables by tumor types**

| Spearman<br>Rho*  | Diagnosis             | Tumor                        |                 | ADC†            |
|-------------------|-----------------------|------------------------------|-----------------|-----------------|
|                   |                       | Volume<br>(cc <sup>3</sup> ) | CE <sup>§</sup> |                 |
| (P‡, N)           |                       |                              |                 |                 |
| Maximum           | AA □ RR¶              | 0.19(0.42,20)                | 0.07(0.76,20)   | -0.23(0.41,15)  |
| Tumor             | A/AG#RR¶              | 0.27(0.29,17)                | 0.41(0.12,16)   | -0.02(0.93,15)  |
| FDG               |                       |                              |                 |                 |
| Uptake            | BSG**RR¶              | 0.24(0.43,13)                | 0.34(0.26,13)   | 0.26(0.47,10)   |
| /GM <sup>§§</sup> | BSG**ND††             | 0.21(0.20,39)                | 0.27(0.11,36)   | -0.32(0.054,36) |
|                   | GBM <sup>‡‡</sup> RR¶ | 0.38(0.22,12)                | 0.80(0.003,11)  |                 |
| Mean              | AA □ RR¶              | 0.09(0.72,20)                | -0.05(0.82,20)  | -0.19(0.50,15)  |
| Tumor             | A/AG#RR¶              | 0.30(0.24,17)                | 0.48(0.06,16)   | -0.12(0.68,15)  |
| FDG               |                       |                              |                 |                 |
| Uptake            | BSG**RR¶              | 0.04(0.89,13)                | 0.26(0.39,13)   | 0.21(0.55,10)   |
| /GM <sup>§§</sup> | BSG**ND††             | 0.14(0.40,39)                | 0.19(0.26, 36)  | -0.27(0.12,36)  |
|                   | GBM <sup>‡‡</sup> RR¶ | 0.48(0.12,12)                | 0.72(0.013,11)  |                 |
| Maximum           | AA □ RR¶              | 0.20(0.40,20)                | 0.05(0.83,20)   | -0.1(0.73,15)   |
| Tumor             | A/AG#RR¶              | 0.09(0.74,17)                | 0.27(0.31,16)   | 0.15(0.59,15)   |
| FDG               |                       |                              |                 |                 |
| Uptake            | BSG**RR¶              | 0.33(0.27,13)                | 0.32(0.28,13)   | 0.03(0.93,10)   |
| /WM □ □           | BSG**ND††             | 0.23(0.16,39)                | 0.26(0.13,36)   | -0.48(0.003,36) |

| Spearman             |                                    | Tumor                     |                 |                  |
|----------------------|------------------------------------|---------------------------|-----------------|------------------|
| Rho*                 | Diagnosis                          | Volume (cc <sup>3</sup> ) | CE <sup>§</sup> | ADC <sup>†</sup> |
| (P <sup>‡</sup> , N) |                                    |                           |                 |                  |
|                      | GBM <sup>‡‡</sup> RR <sup>¶</sup>  | 0.51(0.09,12)             | 0.78(0.0045,11) |                  |
| Mean                 | AA <sup>□</sup> RR <sup>¶</sup>    | 0.10(0.67,20)             | -0.11(0.63,20)  | 0.01(0.98,15)    |
| Tumor                | A/AG <sup>#</sup> RR <sup>¶</sup>  | 0.00(1.00,17)             | 0.30(0.26,16)   | 0.03(0.93,15)    |
| FDG                  |                                    |                           |                 |                  |
| Uptake               | BSG <sup>**</sup> RR <sup>¶</sup>  | 0.15(0.61,13)             | 0.52(0.070,13)  | -0.01(0.97,10)   |
| /WM <sup>□□</sup>    | BSG <sup>**</sup> ND <sup>††</sup> | 0.04(0.79,39)             | 0.45(0.0062,36) | -0.54(0.0007,36) |
|                      | GBM <sup>‡‡</sup> RR <sup>¶</sup>  | 0.55(0.063,12)            | 0.69(0.019,11)  |                  |

\*Correlation estimates not provided where sample size <10.

†ADC = Apparent Diffusion Coefficient

‡P = p value

§CE=Contrast Enhancement,

□AA=Anaplastic Astrocytoma,

¶RR=Refractory/recurrent, #A/AG=Astrocytoma/Astrocytic Glioma, \*\*BSG=Brain Stem Glioma, ††ND=Newly Diagnosed, ‡‡GBM=Glioblastoma Multiforme, §§GM=Gray Matter, □□WM=White Matter

**SUPPLEMENTAL TABLE 3: Cox proportional hazards models of PFS and OS by tumor types\***

| PET Variables                 | Diagnosis                          | PFS*             |         | OS†             |         |
|-------------------------------|------------------------------------|------------------|---------|-----------------|---------|
|                               |                                    | HR‡(95%CI§)      | p-value | HR(95%CI)       | p-value |
| FDG Uptake                    | BSG <sup>  </sup> RR <sup>¶</sup>  | 0.79(0.68,82.64) | 0.10    |                 |         |
| Intensity                     | BSG <sup>  </sup> ND <sup>#</sup>  | 1.09(0.53,2.26)  | 0.81    | 1.64(0.78,3.43) | 0.19    |
|                               | GBM <sup>**</sup> RR <sup>¶</sup>  | 1.03(0.34,3.1)   | 0.95    |                 |         |
|                               | AA <sup>††</sup> RR <sup>¶</sup>   | 0.93(0.41,2.12)  | 0.87    | 2.28(0.6,8.67)  | 0.23    |
|                               | A/AG <sup>‡‡</sup> RR <sup>¶</sup> | 0.63(0.19,2.1)   | 0.45    |                 |         |
| FDG Uptake                    | BSG <sup>  </sup> RR <sup>¶</sup>  | 0.52(0.14,1.98)  | 0.34    |                 |         |
| Uniformity                    | BSG <sup>  </sup> ND <sup>#</sup>  | 1.78(0.96,3.28)  | 0.065   | 1.59(0.82,3.06) | 0.17    |
|                               | GBM <sup>**</sup> RR <sup>¶</sup>  | 0.8(0.26,2.51)   | 0.71    |                 |         |
|                               | AA <sup>††</sup> RR <sup>¶</sup>   | 1.5(0.56,3.97)   | 0.42    | 1.2(0.23,6.31)  | 0.83    |
|                               | A/AG <sup>‡‡</sup> RR <sup>¶</sup> | 1.51(0.19,12.03) | 0.69    |                 |         |
| CE <sup>§§</sup>              | BSG <sup>  </sup> RR <sup>¶</sup>  | 0.26(0.1,0.71)   | 0.0081  |                 |         |
|                               | BSG <sup>  </sup> ND <sup>#</sup>  | 0.99(0.6,1.62)   | 0.96    | 1.61(0.92,2.83) | 0.094   |
|                               | GBM <sup>**</sup> RR <sup>¶</sup>  | 0.51(0.06,4.41)  | 0.54    |                 |         |
|                               | AA <sup>††</sup> RR <sup>¶</sup>   | 1.16(0.6,2.24)   | 0.67    | 0.81(0.3,2.22)  | 0.68    |
|                               | A/AG <sup>‡‡</sup> RR <sup>¶</sup> | 1.63(0.44,6.07)  | 0.47    |                 |         |
| Mean Tumor                    | BSG <sup>  </sup> RR <sup>¶</sup>  | 1.14(0.09,13.78) | 0.92    |                 |         |
| FDG Uptake /WM <sup>   </sup> | BSG <sup>  </sup> ND <sup>#</sup>  | 1.16(0.6,2.24)   | 0.66    | 1.38(0.71,2.68) | 0.35    |
|                               | GBM <sup>**</sup> RR <sup>¶</sup>  | 1.12(0.75,1.67)  | 0.59    |                 |         |
|                               | AA <sup>††</sup> RR <sup>¶</sup>   | 1.04(0.6,1.81)   | 0.89    | 1.98(0.79,4.96) | 0.14    |
|                               | A/AG <sup>‡‡</sup> RR <sup>¶</sup> | 0.86(0.28,2.67)  | 0.8     |                 |         |
| Maximum                       | BSG <sup>  </sup> RR <sup>¶</sup>  | 0.65(0.11,3.91)  | 0.64    |                 |         |
| Tumor FDG Uptake              | BSG <sup>  </sup> ND <sup>#</sup>  | 1.52(0.88,2.62)  | 0.14    | 1.66(0.94,2.93) | 0.079   |
|                               | GBM <sup>**</sup> RR <sup>¶</sup>  | 1.15(0.85,1.57)  | 0.37    |                 |         |

|                   |                                    |                  |      |                   |       |
|-------------------|------------------------------------|------------------|------|-------------------|-------|
| /WM <sup>  </sup> | AA <sup>††</sup> RR <sup>¶</sup>   | 1.08(0.7,1.65)   | 0.73 | 1.35(0.88,2.08)   | 0.17  |
|                   | A/AG <sup>‡‡</sup> RR <sup>¶</sup> | 0.87(0.31,2.42)  | 0.79 |                   |       |
| Mean Tumor        | BSG <sup>  </sup> RR <sup>¶</sup>  | 1.76(0.06,52.13) | 0.74 |                   |       |
| FDG Uptake        | BSG <sup>  </sup> ND <sup>#</sup>  | 1.45(0.36,5.91)  | 0.6  | 2.45(0.57,10.53)  | 0.23  |
| /GM <sup>¶¶</sup> | GBM <sup>**</sup> RR <sup>¶</sup>  | 1.75(0.76,4.07)  | 0.19 |                   |       |
|                   | AA <sup>††</sup> RR <sup>¶</sup>   | 1.54(0.47,5.08)  | 0.48 | 12.36(1.67,91.64) | 0.014 |
|                   | A/AG <sup>‡‡</sup> RR <sup>¶</sup> | 0.87(0.11,6.8)   | 0.89 |                   |       |
| Maximum           | BSG <sup>  </sup> RR <sup>¶</sup>  | 1.03(0.06,19.19) | 0.98 |                   |       |
| Tumor FDG         | BSG <sup>  </sup> ND <sup>#</sup>  | 1.80(0.64,5.09)  | 0.26 | 2.75(0.94,7.99)   | 0.064 |
| Uptake            | GBM <sup>**</sup> RR <sup>¶</sup>  | 1.44(0.71,2.92)  | 0.31 |                   |       |
| /GM <sup>¶¶</sup> | AA <sup>††</sup> RR <sup>¶</sup>   | 1.25(0.62,2.51)  | 0.53 | 1.99(0.93,4.26)   | 0.077 |
|                   | A/AG <sup>‡‡</sup> RR <sup>¶</sup> | 0.86(0.16,4.72)  | 0.87 |                   |       |

\*Association of FDG uptake uniformity, intensity and CE with OS<sup>†</sup> for refractory/recurrent BSG, GBM and astrocytoma/astrocytic glioma could not be calculated due to small number of OS events.

\*PFS=Progression-Free Survival, <sup>†</sup>OS=Overall Survival, <sup>‡</sup>HR=Hazards Ratio, <sup>§</sup>CI=Confidence Interval, <sup>||</sup>BSG=Brain Stem Glioma, <sup>¶</sup>RR=Refractory/recurrent, <sup>#</sup>ND = Newly Diagnosed, <sup>\*\*</sup>GBM=Glioblastoma Multiforme, <sup>††</sup>AA=Anaplastic Astrocytoma, <sup>‡‡</sup>A/AG=Astrocytoma/Astrocytic Glioma, <sup>§§</sup>CE=Contrast Enhancement  
<sup>||</sup>WM=White Matter, <sup>¶¶</sup>GM=Gray Matter
